# Supplementary material
Source: Royal Society of Chemistry journal article supplement (doi:10.1039/d6cy00074f)
Supplement: d6cy00074f1.pdf [file d6cy00074f1.pdf]

## Supporting Information

### **Cu encapsulated in hierarchical MFI zeolites for the ethanol dehydrogenation to acetaldehyde**

Kachaporn Saenluang<sup>a</sup>, Narasiri Mainewaklang<sup>a</sup>, Anittha Prasertsab<sup>a</sup>,  
Tawan Sooknoi<sup>c</sup>, Søren Kegnæs<sup>b,\*</sup> and Chularat Wattanakit<sup>a,\*</sup>

<sup>a</sup>Department of Chemical and Biomolecular Engineering, School of Energy Science and Engineering, Vidyasirimedhi Institute of Science and Technology, Rayong 21210, Thailand.

<sup>b</sup>DTU Chemistry, Technical University of Denmark, 2800 Kgs, Lyngby, Denmark.

<sup>c</sup>Department of Chemistry, School of Science, King Mongkut's Institute of Technology Ladkrabang, Chalongkrung Road, Ladkrabang, Bangkok 10520, Thailand.

\* Correspondence: [chularat.w@vistec.ac.th](mailto:chularat.w@vistec.ac.th) and [skk@kemi.dtu.dk](mailto:skk@kemi.dtu.dk)

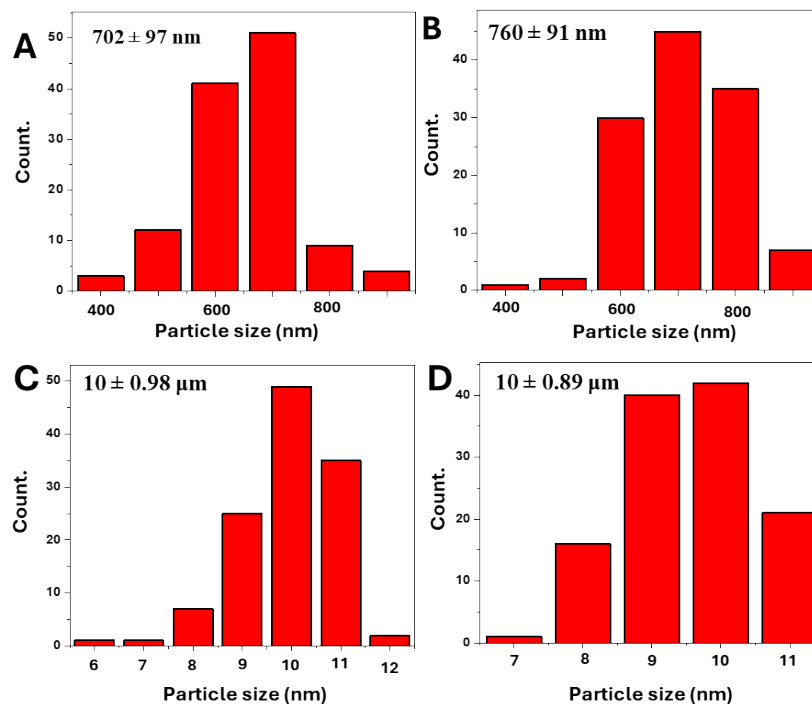

**Figure S1.** Particle size distribution of (A) Cu@hieZSM-5, (B) Cu@hieS-1, (C) Cu@hieZSM-5, and (D) Cu@conZSM-5. The particle size distribution was determined by counting approximately 100 particles in each sample from SEM images.

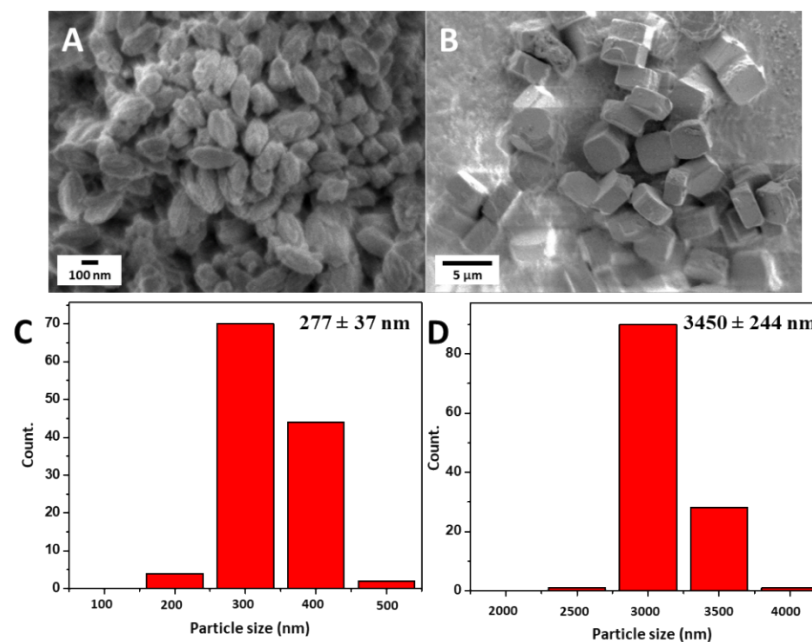

**Figure S2.** SEM images of (A) hieZSM-5 and (B) conZSM-5 and Particle size distribution of (C) hieZSM-5 and (D) conZSM-5. The particle size distribution was determined by counting approximately 100 particles in each sample from SEM images.

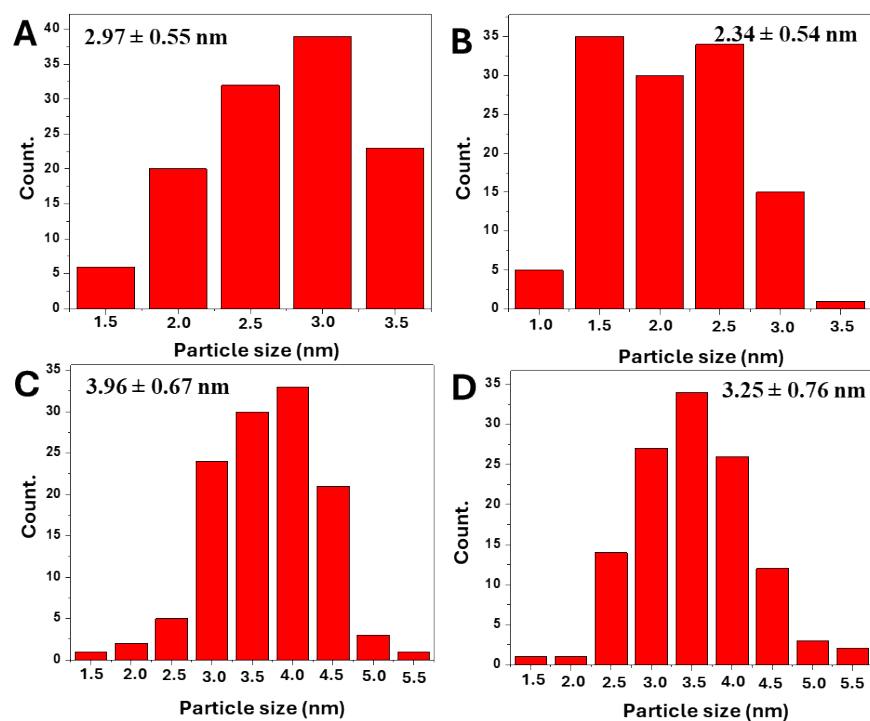

**Figure S3.** Cu nanoparticles size distribution of (A) Cu@hieZSM-5, (B) Cu@hieS-1, (C) Cu@conZSM-5, and (D) Cu@conS-1. The Cu nanoparticle size distribution was determined by counting approximately 100 particles in each sample from TEM images.

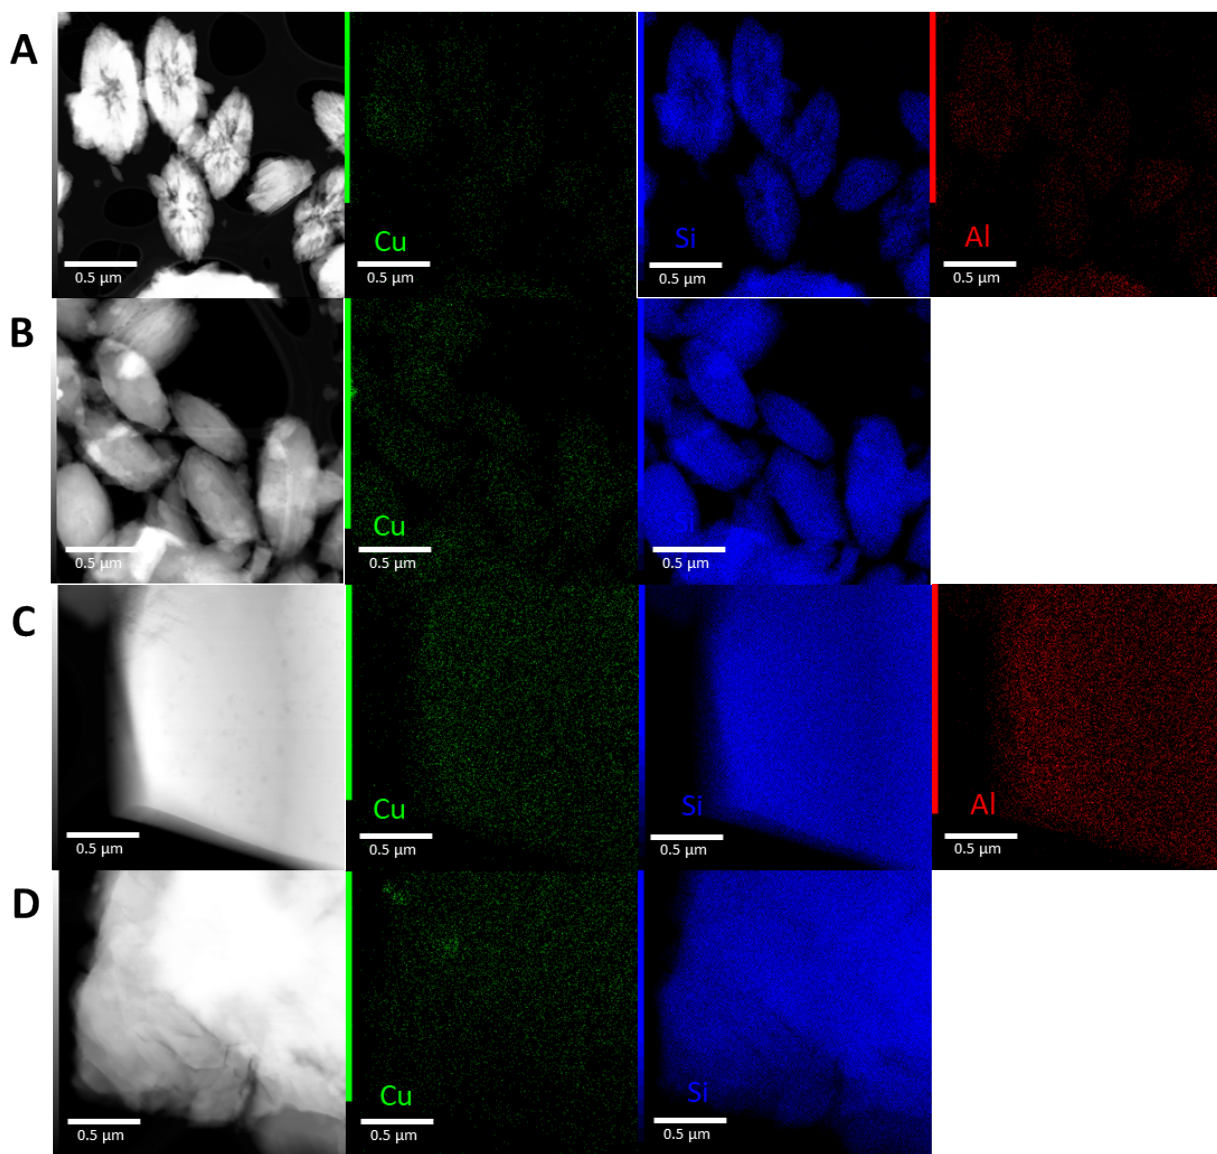

**Figure S4.** TEM-EDS of (A) Cu@hieZSM-5, (B) Cu@hieS-1, (C) Cu@conZSM-5, and (D) Cu@conS-1.

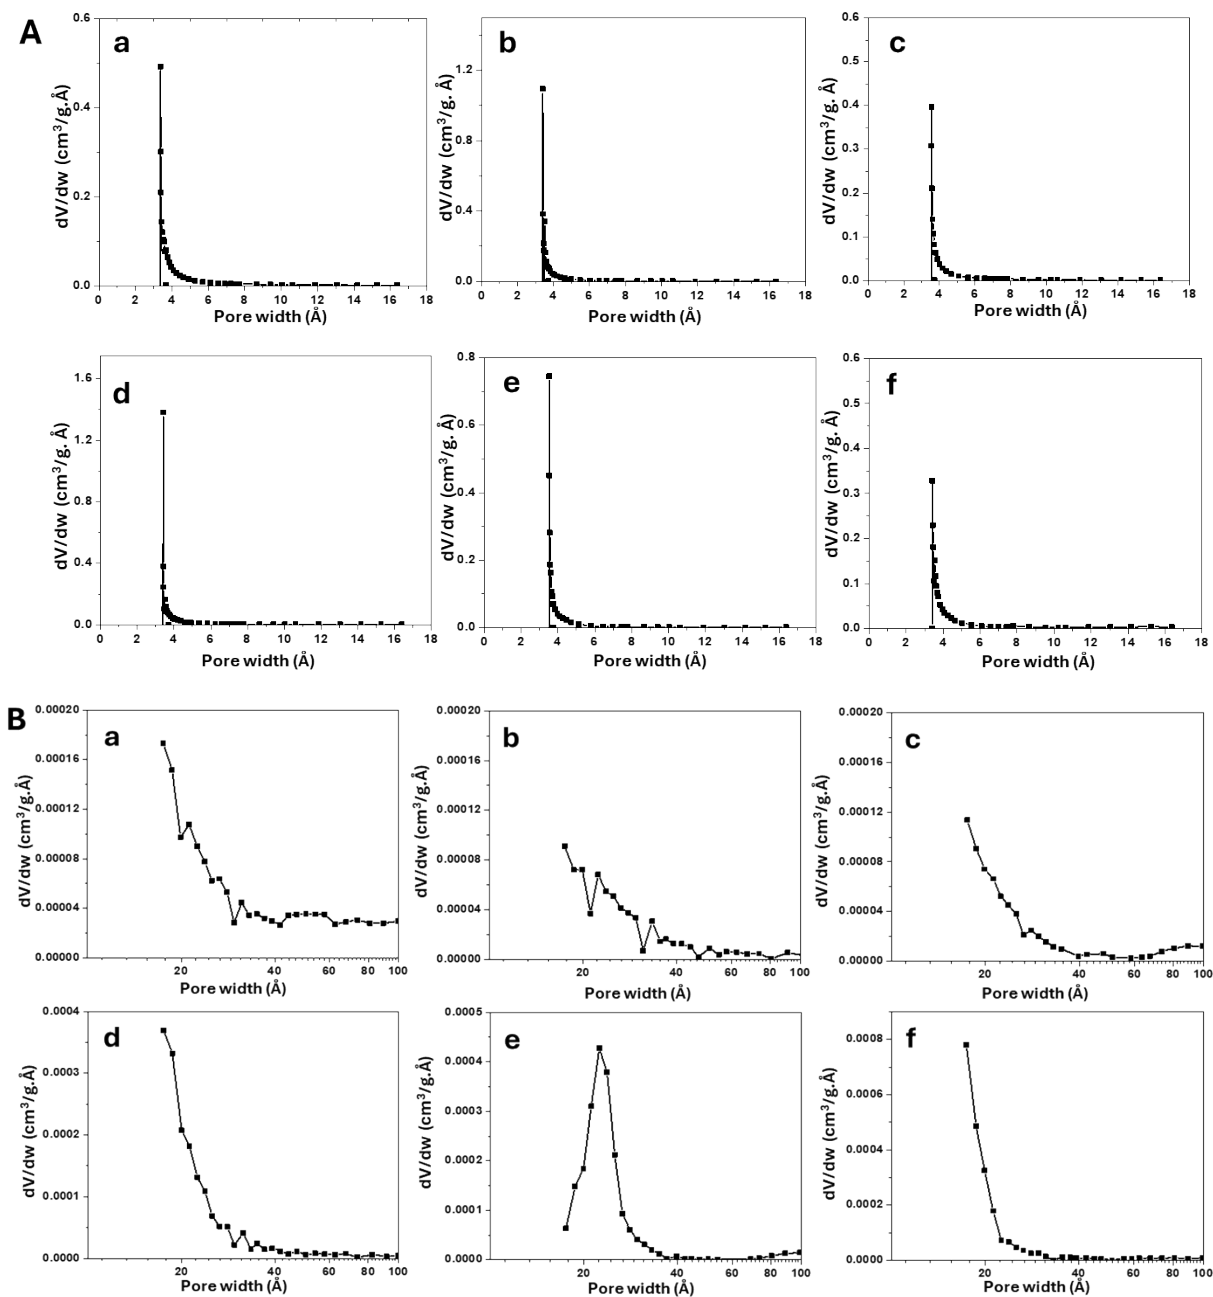

**Figure S5.** (A) Horvath-Kawazoe (HK) and (B) Barrett-Joyner-Halenda (BJH) pore size distribution, of (a) Cu@hieZSM-5, (b) Cu@hieS-1, (c) hieZSM-5, (d) Cu@conZSM-5, (e) Cu@conS-1, and (f) conZSM-5.

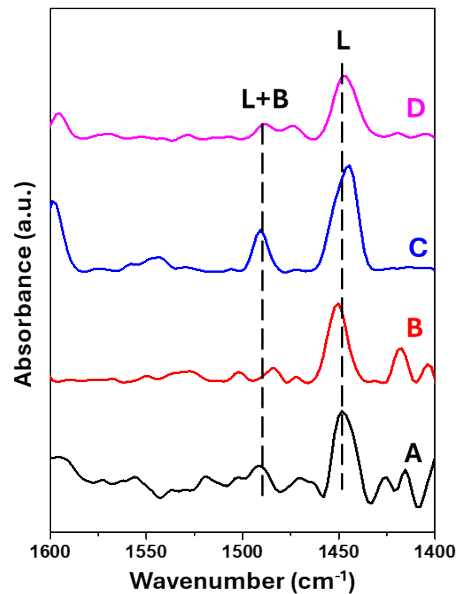

**Figure S6.** Pyridine-adsorption FTIR curves of (A) Cu@hieZSM-5, (B) Cu@hieS-1, (C) Cu@conZSM-5, and (D) Cu@conS-1.

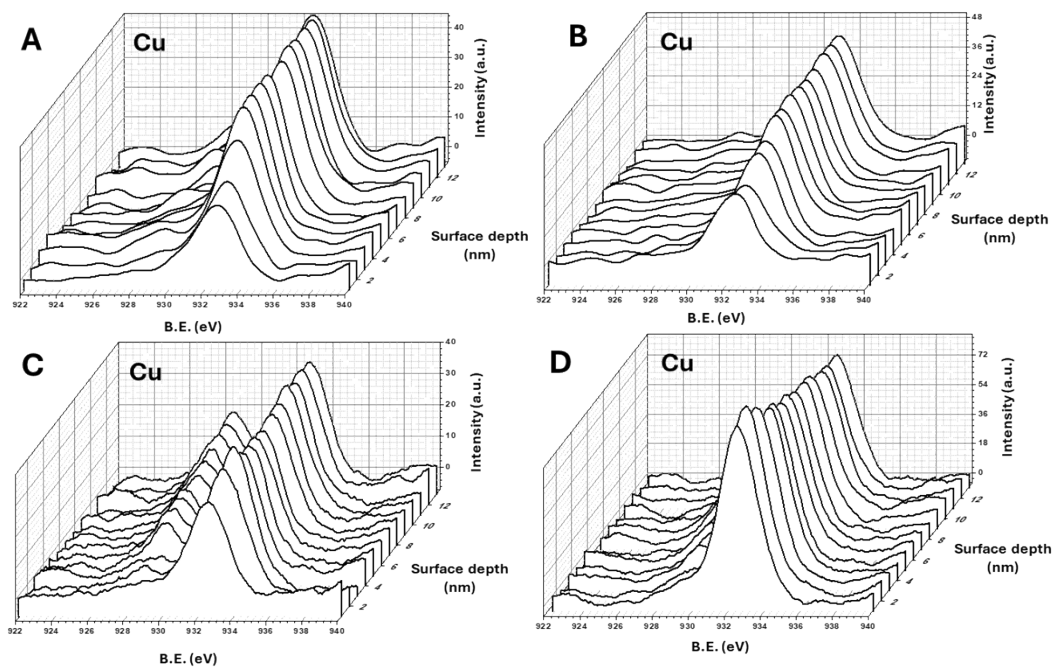

**Figure S7.** XPS depth profile analysis of the Cu species of (A) Cu@hieZSM-5, (B) Cu@hieS-1, (C) Cu@conZSM-5, and (D) Cu@conS-1.

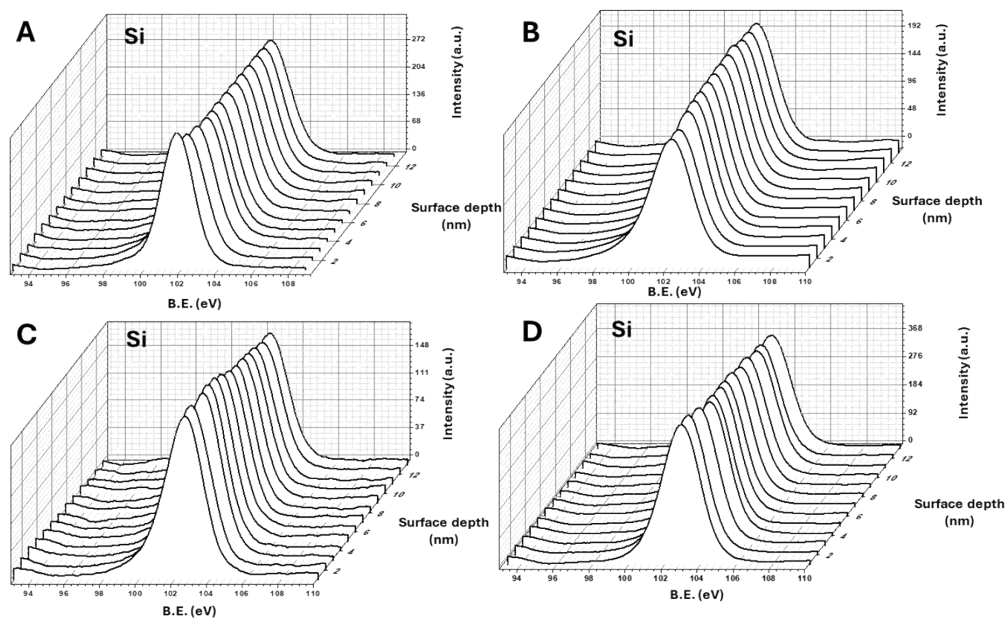

**Figure S8.** XPS depth profile analysis of Si species (A) Cu@hieZSM-5, (B) Cu@hieS-1, (C) Cu@conZSM-5, and (D) Cu@conS-1.

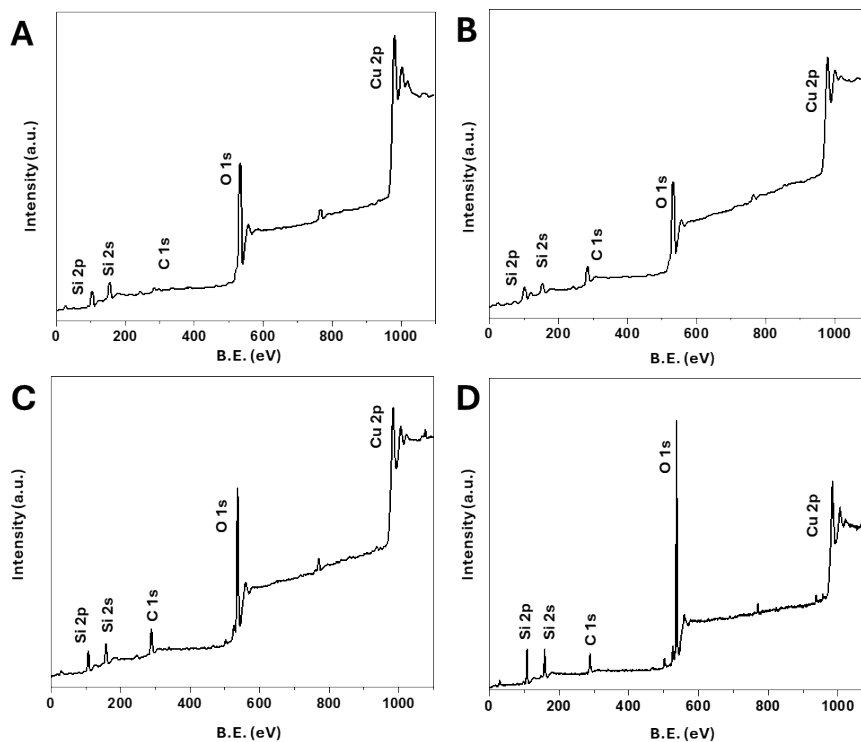

**Figure S9.** XPS spectra in wide scan (A) Cu@hieZSM-5, (B) Cu@hieS-1, (C) Cu@conZSM-5, and (D) Cu@conS-1.

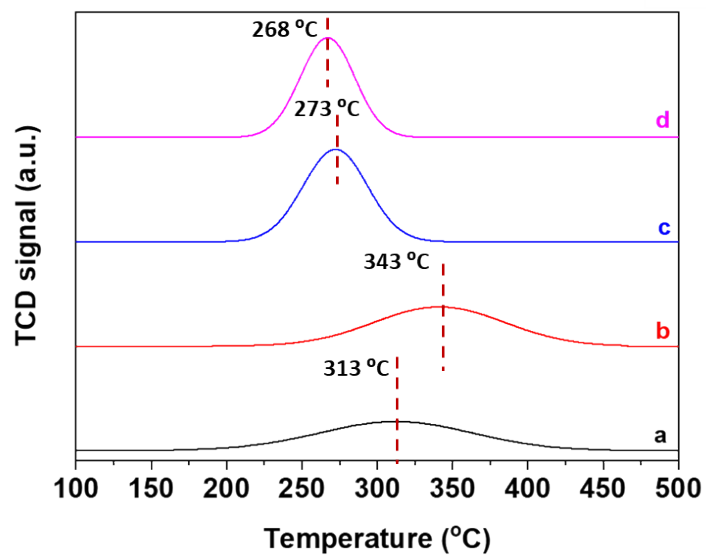

**Figure S10.** H<sub>2</sub>-TPR analysis of (A) Cu@hieZSM-5, (B) Cu@hieS-1, (C) Cu@conZSM-5, and (D) Cu@conS-1.

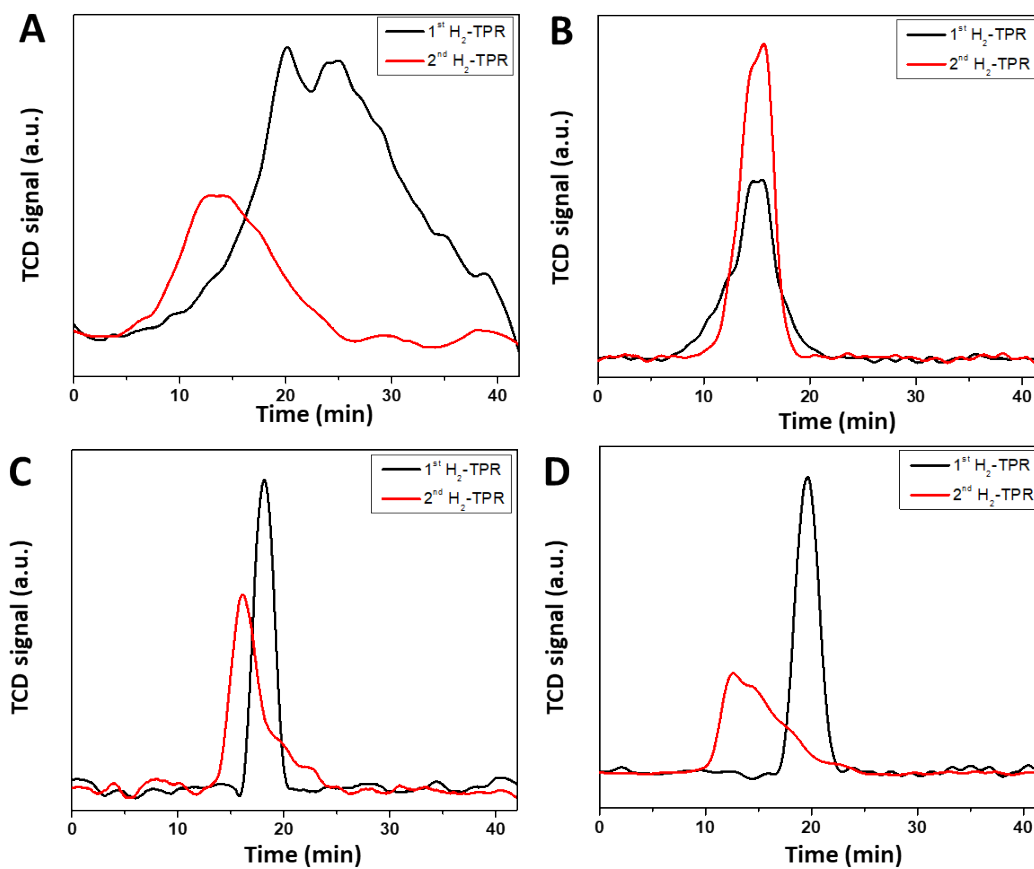

**Figure S11.** Cu dispersion derived by H<sub>2</sub>/N<sub>2</sub>O-TPR profiles of (A) Cu@hieZSM-5, (B) Cu@hieS-1, (C) Cu@conZSM-5, and (D) Cu@conS-1.

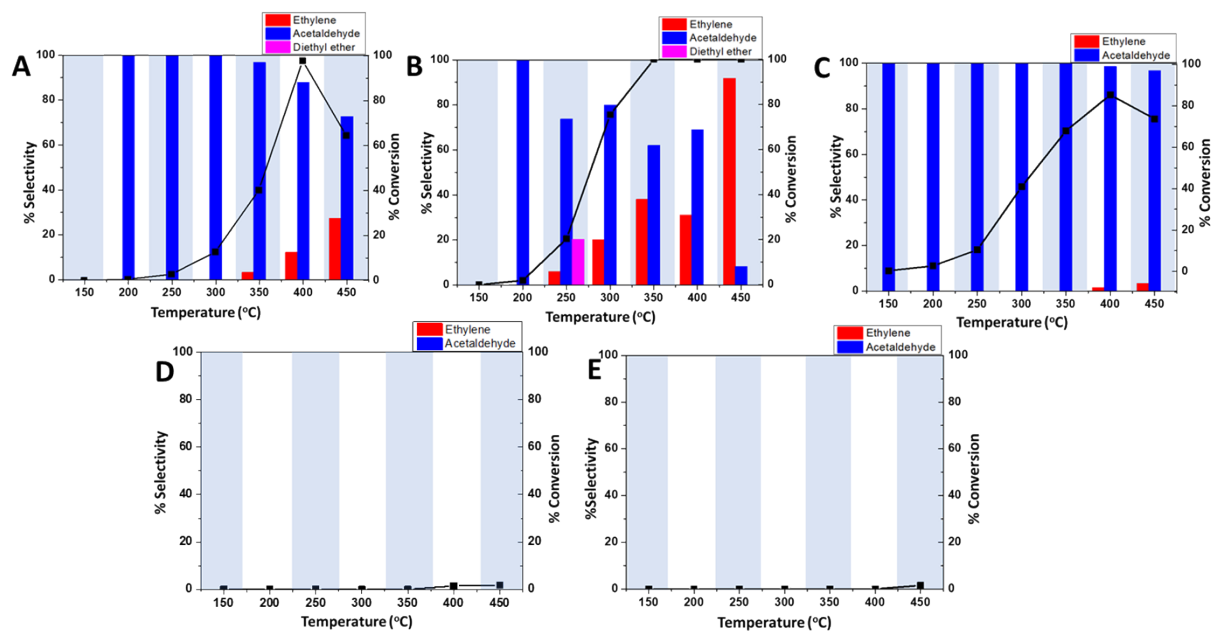

**Figure S12.** 10%wt ethanol conversion (%) and product selectivities (%) by varying reaction temperature of (A) Cu@hieZSM-5, (B) Cu@conZSM-5, (C) Cu@conS-1, (D) hieZSM-5, and (E) conZSM-5. Condition: 0.1g of catalyst was treated in 10% $H_2$  gas, a flow rate of reactant 0.04 ml/min, and 50 ml/min of  $N_2$  gas.

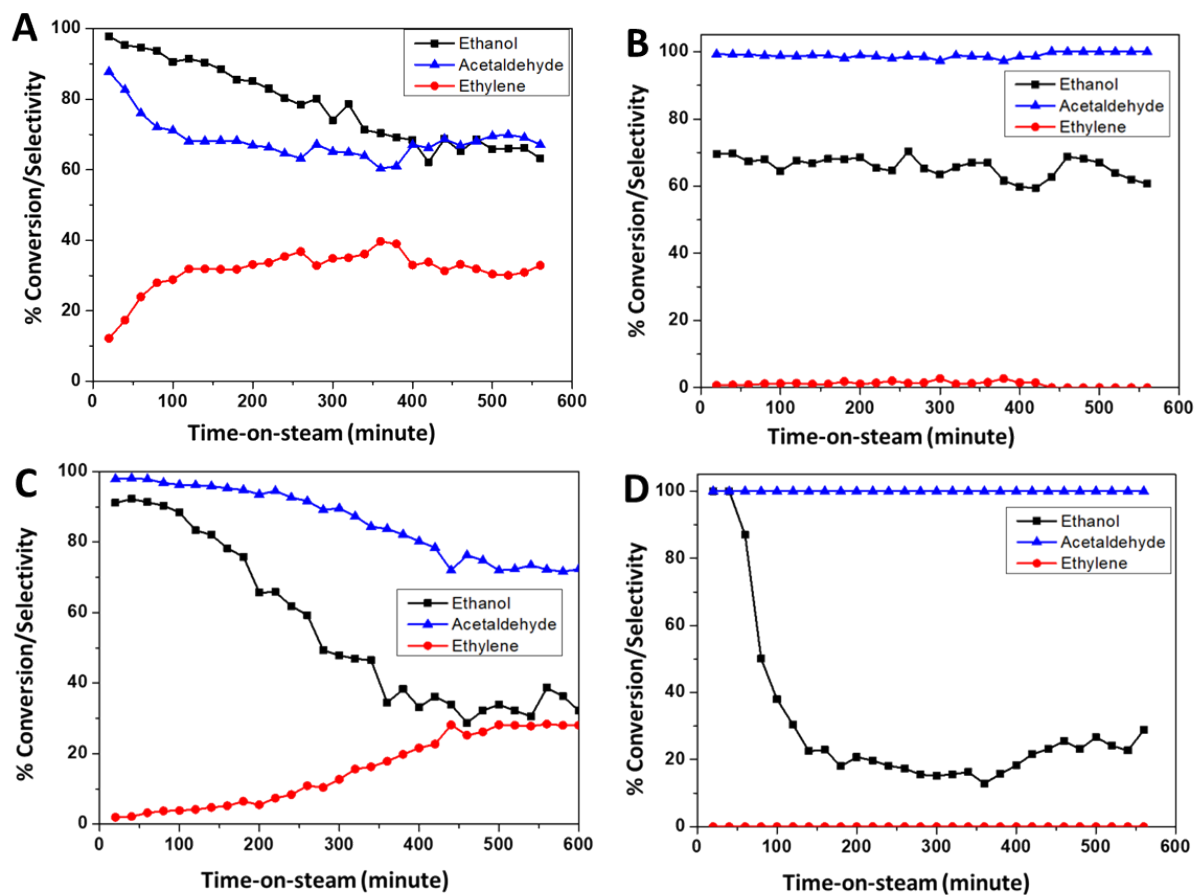

**Figure S13.** The catalytic stability of 10%wt ethanol as a reactant over (A) Cu@hieZSM-5, (B) Cu@hieS-1, (C) Cu@conZSM-5, and (D) Cu@conS-1. Condition: 0.1g of catalyst was treated in 10% $H_2$  gas, a flow rate of reactant 0.04 ml/min, and 50 ml/min of  $N_2$  gas at 400°C.

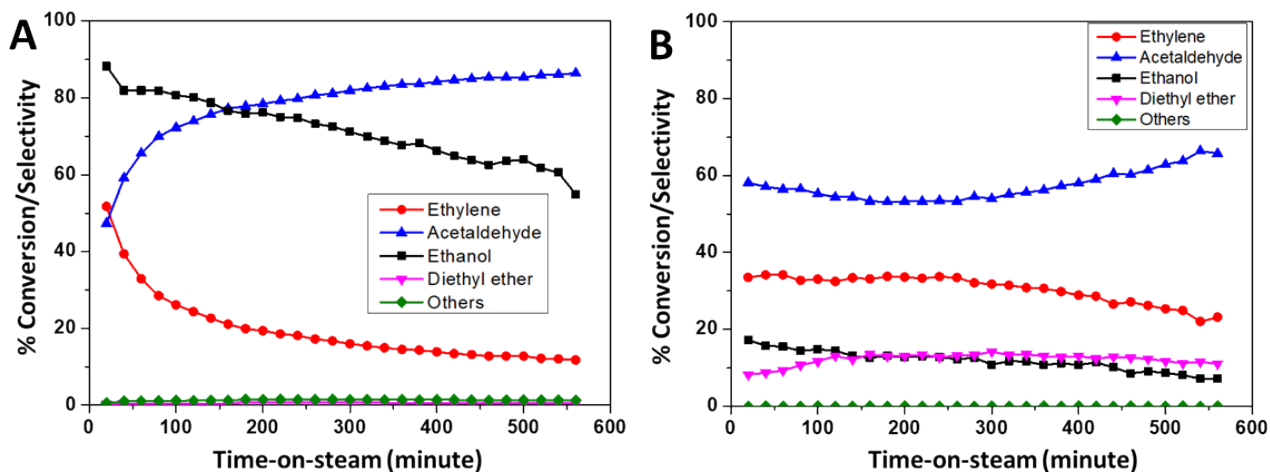

**Figure S14.** The catalytic stability of absolute ethanol as a reactant as a reactant over (A) Cu@hieZSM-5 and (B) Cu@conZSM-5. Condition: 0.1g of catalyst was treated in 10% $H_2$  gas, a flow rate of reactant 0.04 ml/min, and 50 ml/min of  $N_2$  gas at 400°C.

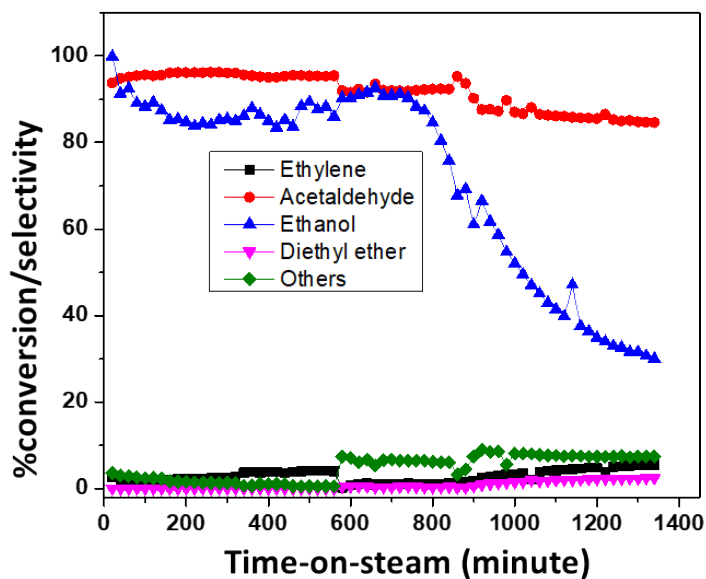

**Figure S15.** The catalytic stability of absolute ethanol as a reactant as a reactant over Cu@hieS-1 sample. Condition: 0.1g of catalyst was treated in 10% $H_2$  gas, a flow rate of reactant 0.04 ml/min, and 50 ml/min of  $N_2$  gas at 400°C.

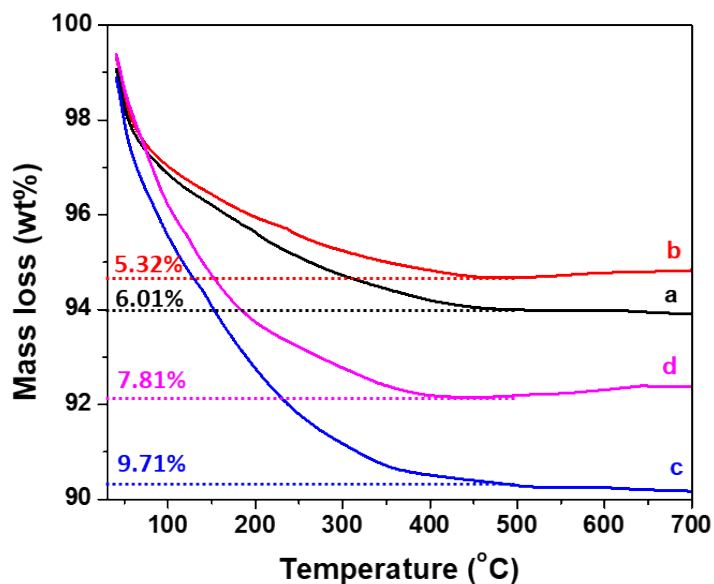

**Figure S16.** Thermogravimetric analysis (TGA) data of spent catalyst of (A) Cu@hieZSM-5, (B) Cu@hieS-1, (C) Cu@conZSM-5, and (D) Cu@conS-1. Reaction condition: 0.1g of catalyst was treated in 10%H<sub>2</sub> gas, a pure ethanol flow rate of reactant of 0.04 ml/min with 50 ml/min of N<sub>2</sub> gas at 400°C for 300 minutes.

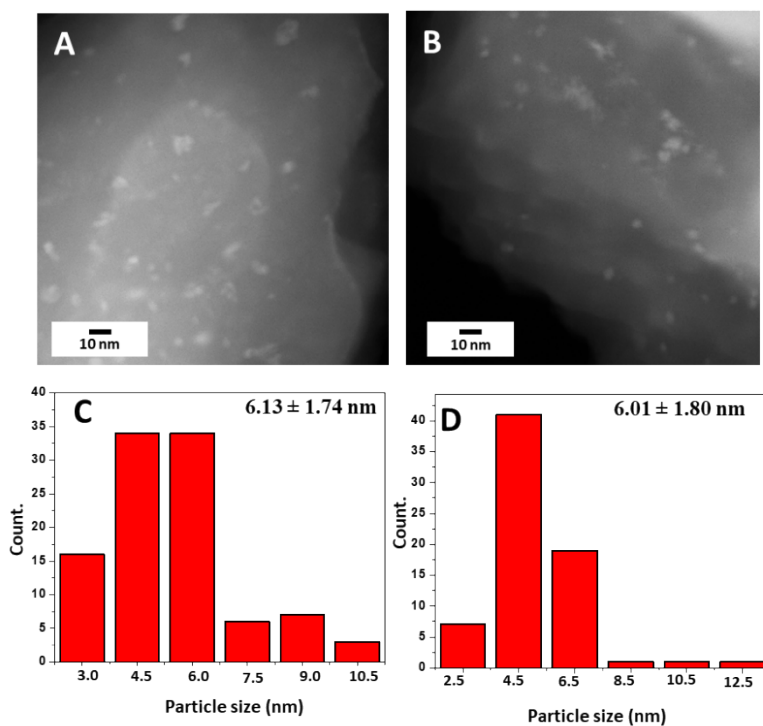

**Figure S17.** STEM images of (A) Cu@hieS-1 and (B) Cu@conS-1 and Cu nanoparticle size distribution after the reaction over (C) Cu@hieS-1 and (D) Cu@conS-1. The Cu nanoparticle size distribution was determined by counting approximately 100 particles in each sample from SEM images.

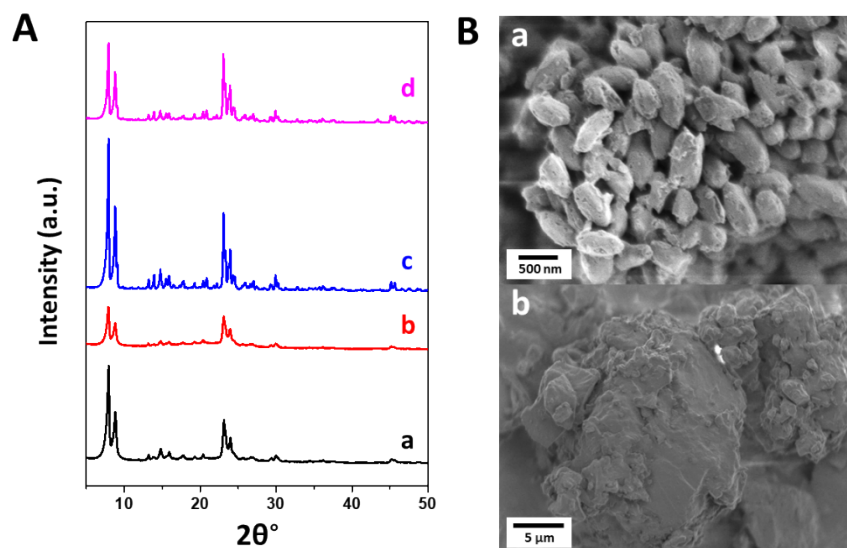

**Figure S18.** (A) XRD patterns (a) fresh-Cu@hieS-1, (b) spent-Cu@hieS-1, (c) fresh-Cu@conS-1, and (d) spent-Cu@conS-1 and (B) SEM images of (a) spent-Cu@hieS-1 and spent-Cu@conS-1.

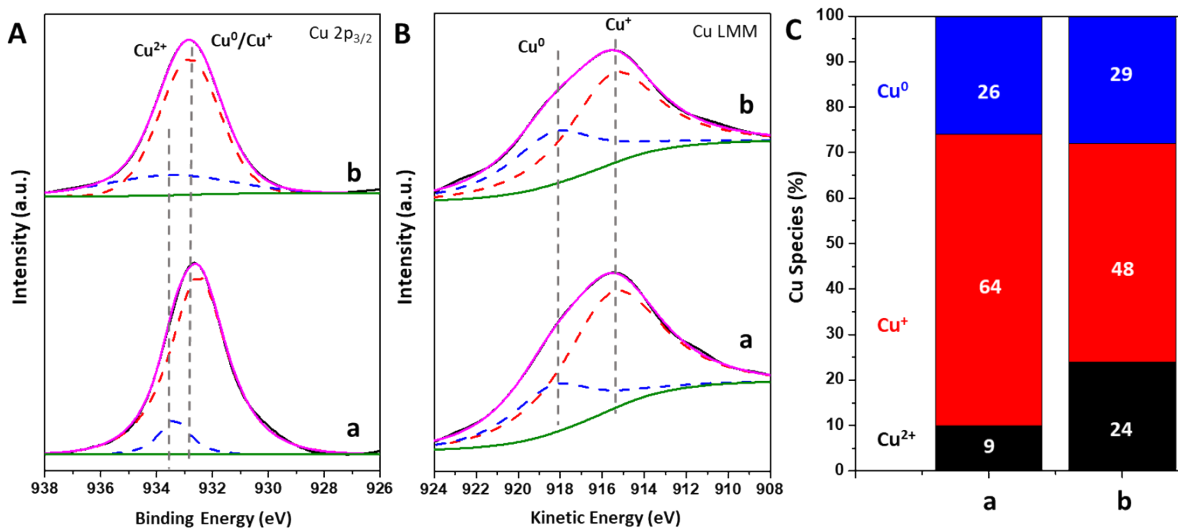

**Figure S19.** XPS spectra at (A) Cu 2p<sub>3/2</sub>, (B) Cu LMM Auger region, and (C) content of different Cu species determined by Cu 2p<sub>3/2</sub> XPS and Cu LMM spectra area of spent catalyst of (a) Cu@hieS-1, and (b) Cu@conS-1.

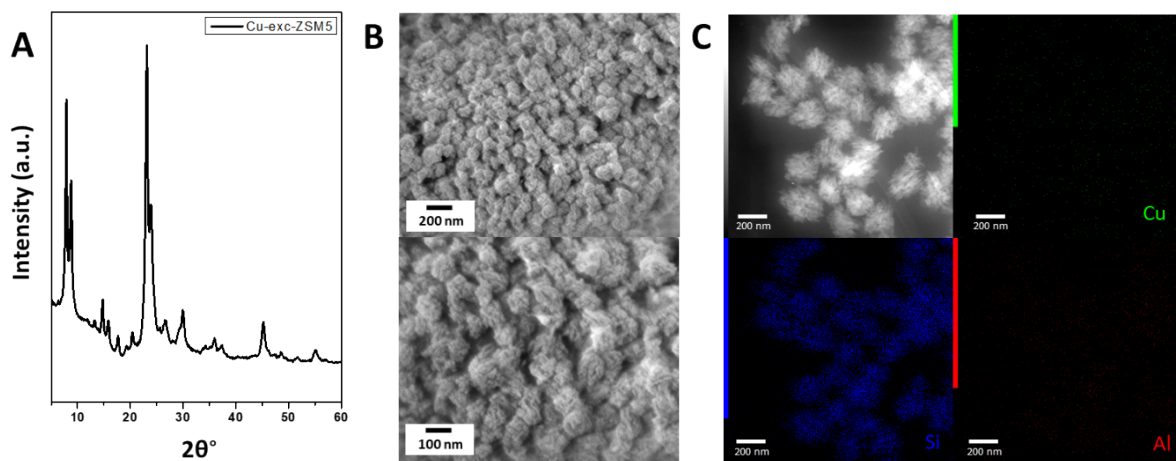

**Figure S20.** (A) XRD pattern, (B) SEM image, (C) TEM image (D) Si, Al, and Cu elemental mappings of Cu-exc-ZSM5 sample. The Cu content 1.2% was measured by XRF.

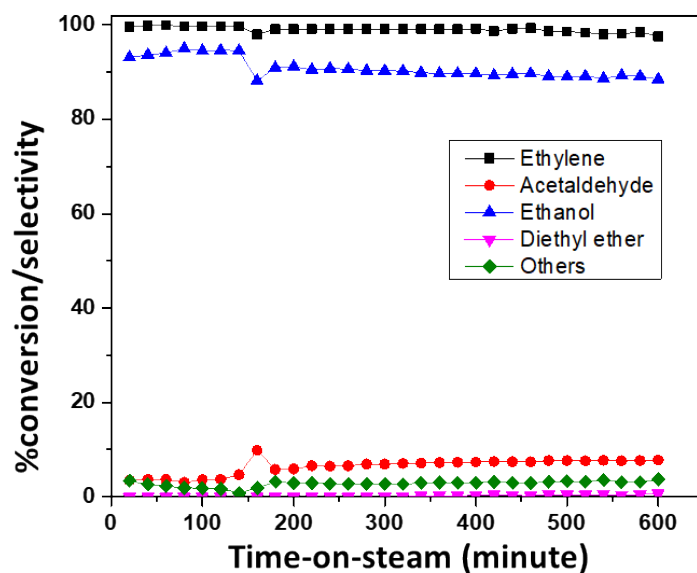

**Figure S21.** The catalytic stability of absolute ethanol as a reactant as a reactant over the comparable Cu-exc-ZSM5 samples. Condition: 0.1g of catalyst was treated in 10% $H_2$  gas, a flow rate of reactant 0.04 ml/min, and 50 ml/min of  $N_2$  gas at 400°C.

**Table S1. Copper Dispersion and Turnover frequency of four catalysts.**

| Sample      | D <sub>cu</sub> <sup>a</sup> | TOF (h <sup>-1</sup> ) <sup>b</sup> |
|-------------|------------------------------|-------------------------------------|
| Cu@hieZSM-5 | 68.6                         | 337                                 |
| Cu@hieS-1   | 82.6                         | 1331                                |
| Cu@conZSM-5 | 55.7                         | 349                                 |
| Cu@conS-1   | 73.5                         | 95                                  |

<sup>a</sup>Cu dispersion (D<sub>cu</sub>) was measured by H<sub>2</sub>-TPR with N<sub>2</sub>O titration and estimated by  $(2 \times A2/A1) \times 100\%$  [A2 is the second H<sub>2</sub> consumption and A1 is the first H<sub>2</sub> consumption] and <sup>b</sup>Turnover frequency (TOF) was calculated by the following equation: acetaldehyde yield/(mol of active site×time)

**Table S2. Turnover frequency (TOF) of the forward ethanol dehydrogenation reaction on different catalysts.**

| Reactant | product      | Catalyst  | Temp. (°C) | TOF <sup>a</sup> (1/h) | Ref.                                                                                                 |
|----------|--------------|-----------|------------|------------------------|------------------------------------------------------------------------------------------------------|
| ethanol  | acetaldehyde | Cu@hieS-1 | 400        | 1331                   | The present work                                                                                     |
| ethanol  | acetaldehyde | Cu/Beta   | 400        | 10.1                   | D. Yu, W. Dai, et al. Chinese J, Catal. 2019, 40, 9, 1375-1384                                       |
| ethanol  | acetaldehyde | Cu-MFI-AE | 300        | 6.6                    | J. Pang, M. et al. ACS Catalysis 2020 10, 22, 13624-13629                                            |
| ethanol  | acetaldehyde | 3Cu/NMC   | 260        | 48.1                   | R. Pulikkal Thumbayil, D. B. Christensen, J. Mielby and S. Kegnæs ChemCatChem 2020 12, 22, 5644-5655 |
| ethanol  | acetaldehyde | Cu@S-1    | 250        | 64.9                   | L. Lin, et al. J. Catal. 2022, 413, 565-574                                                          |

<sup>a</sup>Turnover frequency (TOF) was calculated by the following equation: acetaldehyde yield/(mol of active site×time)
